# Supplementary material for: SSR-Based Analysis of Genetic Diversity and Structure of Sweet Cherry (Prunus avium L.) from 19 Countries in Europe
Source: Plants (Basel). 2021 Sep 23;10(10):1983. doi: 10.3390/plants10101983 (PMC8540667; doi:10.3390/plants10101983)
Supplement: Supplementary file 1 [file plants-10-01983-s001.zip › Cherry genetic diversity_Barreneche et al_Supplementary file Tables S1_ S12-END_revised.xlsx]

## Sheet:  Table S1
Number in the study	Country of the collection	Accession Code	Accession Name§	Origin Country	N° of accessions/group	Matching group in this study	Matching group according to [9]	CHUNQ£
4	MAR	Mor004	Inconnu 1 S13	MARµ	2	1	N/A	246
15	MAR	Mor015	S12	MARµ
12	MAR	Mor012	MA	NA	2	2	N/A	247
26	PRT	INIAV-107	Lisboeta	PRT
61	FRA	FRA057-035	O.T.E.A	GRC	2	3	N/A	184
105	GRC	GRC002	Mpakirtzeika	GRC
83	ITA	ITA380-512	Gemella	ITA	2	4	8	8
180	DEU	DEU451-004	Grolls Schwarze	DEU
95	BIH	BiH039-200	Ašlama S.T.	BIH	2	5	103	103
220	GBR	GBR30-013	Merton Glory	GBR
101	BIH	BiH039-207	Bjelica-Biljur	BIH	2	6	N/A	129
103	BIH	BiH039-209	Ašlamka	BIH
117	ROU	RORSFGI-004	Basicate	ROU	2	7	N/A	250
228	NOR	204	Holmabær	DEU
132	HUN	NGYE-010	Kecskecsöcsű	HUN	2	8	21	21
150	CZE	10F007	Kordia	CZE
136	HUN	NGYE-015	Májusi Hosszúszárú	HUN	2	9	N/A	204
142	HUN	NGYE-021	Szomolyai Fekete	HUN
137	HUN	NGYE-016	Májusi Korai	HUN	2	10	22	22
205	BEL	BEL19-CRAW-013	Cerise Proces*	BEL
252	SWE	BAL517	Fryksås	SWE	2	11	20	20
253	SWE	BAL519	Gårdebo	SWE
225	NOR	401	Alvsaker	NOR	2	12	7	7
227	NOR	501	Gul Biggarreau	NORµ
224	NOR	411	Aga	NOR	2	13	N/A	248
231	NOR	301	Små Elton	GBR
261	EST	EST012-003	Veidenbergi Maguskirss	EST	2	14	N/A	140
272	EST	EST012-014	Tõmmu	EST
262	EST	EST012-004	Helgi	EST	2	15	N/A	141
266	EST	EST012-008	Kaie	EST
270	EST	EST012-012	Mupi	EST	2	16	N/A	148
279	EST	EST012-021	Gronkavaja	BLR
274	EST	EST012-016	Meelika	EST	2	17	N/A	151
285	LVA	LVA001003	Snēpeles Melnie	LVA
276	EST	EST012-018	Irma	EST	2	18	N/A	153
282	EST	EST012-024	Leningradskaja Chernaja	RUS
278	EST	EST012-020	Iput	RUS	2	19	N/A	155
300	LVA	LVA001018	Iputj	RUS
9	MAR	Mor009	Cerissette 1R	MARµ	3	20	N/A	162
31	FRA	FRA057-005	Hative de Bale	CHE
45	FRA	FRA057-019	Abouriou	FRA
10	MAR	Mor010	Cpi	MARµ	3	21	N/A	165
34	FRA	FRA057-008	Bigarreau Marmotte	FRA
110	GRC	GRC008	Samou	GRC
13	MAR	Mor013	Napoleon 1A	NA	3	22	5	5
155	CZE	10F012	Přeúrodná Srdcovka	CZE
243	NOR	311	Stor Elton	GBR
87	BIH	BiH039-192	Aprilska - Mostarska Rana*	BIH	3	23	29	29
179	DEU	DEU451-003	Früheste der Mark	DEU/FRA&
247	NOR	601	Fruheste der Mark	DEU
88	BIH	BiH039-193	Rani Hrušt	BIH	3	24	77	77
104	GRC	GRC001	Agiorgitiko Lilantiou	GRC
163	SVK	SVK001005	Cachtice 8	SVK
90	BIH	BiH039-195	Grki Hrušt	BIH	3	25	N/A	118
94	BIH	BiH039-199	Crni Rušt	BIH
124	HUN	NGYE-002	Disznódi Fűszeres	HUN
126	HUN	NGYE-004	Fehér Cseresznye	HUN	3	26	6	6
127	HUN	NGYE-005	Fehér Ropogós Pollenadó	HUN
138	HUN	NGYE-017	Pákozdi Fehér	HUN
134	HUN	NGYE-012	Késői Vadcseresznye	HUN	3	27	N/A	131
141	HUN	NGYE-020	Szeptember	HUN
151	CZE	10F008	Ladeho pozdní	CZE
173	AUT	BOKU-005	Kritzendorfer Einsiedekirsche Typ 1	AUT	3	28	88	88
174	AUT	BOKU-006	Kritzendorfer Einsiedekirsche Typ 2	AUT
191	DEU	DEU451-015	Schöne von Marienhöhe	DEU
182	DEU	DEU451-006	Kassins Frühe	DEU	3	29	84	84
232	NOR	406	Kassin	DEU
235	NOR	507	Mersten	NA
198	BEL	BEL19-CRAW-004	Abbesse de Mouland	BEL	3	30	N/A	115
206	BEL	BEL19-CRAW-014	Bigarreau Noir	BEL
208	BEL	BEL19-CRAW-016	Bigarreau Noir Hâtif	BEL
8	MAR	Mor008	CA	MARµ	5	31	N/A	187
16	MAR	Mor016	Van1Q	CAN
18	MAR	Mor018	VN	MARµ
24	PRT	INIAV-105	Maringa	PRT
65	FRA	FRA057-039	Van	CAN
14	MAR	Mor014	NS	MARµ	5	32	30	30
52	FRA	FRA057-026	Blanche de Gaujac	FRA
62	FRA	FRA057-036	Napoleon	DEU
188	DEU	DEU451-012	Große Prinzessin	DEU
207	BEL	BEL19-CRAW-015	Bigarreau Blanc Tardif	FRA
39	FRA	FRA057-013	Tombret	FRA	5	33	4	4
71	ITA	ITA380-201	Durone Nero II	ITA
84	ITA	ITA380-514	Durona di Cesena	ITA
130	HUN	NGYE-008	Fertődi Csüngő	HUN
221	GBR	GBR30-014	Noble	GBR
67	FRA	FRA057-041	Negre de Bistrita	ROU	5	34	2	2
149	CZE	10F006	Kaštánka	GBR
168	SVK	SVK001010	Dr.Macaj*	SVK
216	GBR	GBR30-009	Early Rivers	GBR
248	NOR	208	Early Rivers	GBR
1	MAR	Mor001	3BC	MARµ	6	35	25	25
20	PRT	INIAV-101	Tavora A	PRT
25	PRT	INIAV-106	Tavora VR	PRT
35	FRA	FRA057-009	Bigarreau Moreau	FRA
194	DEU	DEU451-018	Souvenir de Charmes	FRA
229	NOR	002	Hordatun	NOR
2	MAR	Mor002	Bah	MARµ	6	36	N/A	172
5	MAR	Mor005	BGh	MARµ
6	MAR	Mor006	BN	MARµ
7	MAR	Mor007	Burlat 1R	MARµ
44	FRA	FRA057-018	Bigarreau Hatif Burlat	FRA
106	GRC	GRC003	Chalkidos	GRC
21	PRT	INIAV-102	Branca	PRT	6	37	9	9
50	FRA	FRA057-024	Grosse blanche de Verchocq	FRA
176	AUT	KLOST-002	Kirsche Kierling	AUT
181	DEU	DEU451-005	Drogans Gelbe Knorpelkirsche	DEU
197	BEL	BEL19-CRAW-003	Bigarreau Jaune Tardif	BEL
293	LVA	LVA001011	Dzintars	LVA
23	PRT	INIAV-104	Morangal	PRT	6	38	44	44
56	FRA	FRA057-030	Grosse Rouge de la Faculté	IRN
102	BIH	BiH039-208	Crveni Hrušt	BIH
114	ROU	RORSFGI-001	Boambe de Cotnari	ROU
177	DEU	DEU451-001	Büttners Rote Knorpelkirsche	DEU
240	NOR	408	Emperor Francis	DEU/AUT&
93	BIH	BiH039-198	Bijeli Rušt	BIH	7	39	23	23
97	BIH	BiH039-202	Hrušt	BIH
146	CZE	10F003	Holovouská Chrupka	CZE
160	SVK	SVK001002	Cachtice 4	SVK
167	SVK	SVK001009	Brdarka 795	SVK
192	DEU	DEU451-016	Hedelfinger	DEU
203	BEL	BEL19-CRAW-011	Cerise Benne	BEL
11	MAR	Mor011	Cpl	MARµ	12	40	3	3
17	MAR	Mor017	Van	CAN
70	ITA	ITA380-163	Ferrovia	ITA
89	BIH	BiH039-194	Kasni hrušt	BIH
123	HUN	NGYE-001	Badacsonyi	HUN
125	HUN	NGYE-003	Farmosi Cseresznye	HUN
135	HUN	NGYE-013	Korai Ropogós	HUN
162	SVK	SVK001004	Cachtice 7	SVK
164	SVK	SVK001006	Cachtice 17	SVK
175	AUT	KLOST-001	Horitschoner Kirsche	AUT
189	DEU	DEU451-013	Schneiders Späte Knorpel Typ Nordwunder	DEU
223	GBR	GBR30-017	Magyar Porc Csereszyne	HUN
§	in bold the accession of each group of duplicates chosen to be included in next steps of the study
£	CHUNQ=Cherry UNiQue genotype code, following a similar approach proposed by the European Malus community [31, 45, 46]
&	two different countries reported as origin country in the litterature
µ	origin country of the accession is unknown here country of the collection which maintained the accession is indicated
*	accession not present in [9]

## Sheet: Table S2
CHUNQ£	Number in the study	Country of the collection	Accession Code	Accession Name§	Origin country&	Status	Pedigree
						1=landrace	Parent 1	Parent 2
						2= early selection
						3=modern breeding
109	169	AUT	BOKU-001	Donnerskircher Blaukirsche	AUT	1
110	170	AUT	BOKU-002	Schartner Rainkirsche	AUT	1
111	171	AUT	BOKU-003	Sämling aus Sauerbrunn	AUT	1
112	172	AUT	BOKU-004	Marzer Kirsche	AUT	1
113	195	BEL	BEL19-CRAW-001	Helshoven	BEL	1
114	196	BEL	BEL19-CRAW-002	Bigarreau Ghijssens	BEL	1
115	198	BEL	BEL19-CRAW-004	Abbesse de Mouland	BEL	1
116	199	BEL	BEL19-CRAW-007	Pirette de Biercée	BEL	1
117	200	BEL	BEL19-CRAW-008	Rouge Dorée	BEL	1
119	201	BEL	BEL19-CRAW-009	Cerise de Lignette	BEL	1
120	202	BEL	BEL19-CRAW-010	Guigne Presgaux 2	BEL	1
121	204	BEL	BEL19-CRAW-012	Cerise Brunin	BEL	1
22	205	BEL	BEL19-CRAW-013	Cerise Proces	BEL	1
122	86	BIH	BiH039-116	Bijeli Triješanj	BIH	1
77	88	BIH	BiH039-193	Rani Hrušt	BIH	1
118	90	BIH	BiH039-195	Grki Hrušt	BIH	1
123	91	BIH	BiH039-196	Alica	BIH	1
124	92	BIH	BiH039-197	Divlja Crna	BIH	1
125	96	BIH	BiH039-201	Bijela Hašlama	BIH	1
126	98	BIH	BiH039-203	Hašlama	BIH	1
127	99	BIH	BiH039-205	Banjalučka Crnica	BIH	1
128	100	BIH	BiH039-206	Cipov	BIH	1
129	103	BIH	BiH039-209	Ašlamka	BIH	1
1	144	CZE	10F001	Černá Špička	CZE	1
28	145	CZE	10F002	Granát	CZE	1
13	147	CZE	10F004	Chlumecká černá Chrupka	CZE	1
130	148	CZE	10F005	Karešova Raná	CZE	1
21	150	CZE	10F007	Kordia	CZE	2
132	152	CZE	10F009	Libědjovická raná	CZE	1
133	153	CZE	10F010	Pivka	CZE	1
134	154	CZE	10F011	Pivovka	CZE	1
5	155	CZE	10F012	Přeúrodná Srdcovka	CZE	1
135	156	CZE	10F013	Švestičková	FRA	1
136	157	CZE	10F014	Těchlovická	CZE	1
137	158	CZE	10F015	Žalanka	CZE	1
90	178	DEU	DEU451-002	Dolleseppler	DEU	3
29	179	DEU	DEU451-003	Früheste der Mark	DEU/FRA&	2
9	181	DEU	DEU451-005	Drogans Gelbe Knorpelkirsche	DEU	2
84	182	DEU	DEU451-006	Kassins Frühe	DEU	2
32	183	DEU	DEU451-007	Knauffs Schwarze	DEU	2
85	184	DEU	DEU451-008	Kronprinz von Hannover	DEU	2
89	185	DEU	DEU451-009	Leipziger Lotkirsche	DEU	2
86	186	DEU	DEU451-010	Lommatzscher Glasierte	DEU	2
87	187	DEU	DEU451-011	Nafrina	DEU	3	Werdersche Frühe	Büttners Rote Knorpelkirsche
39	190	DEU	DEU451-014	Teickners Schwarze Herzkirsche	DEU	2
88	191	DEU	DEU451-015	Schöne von Marienhöhe	DEU	2
23	192	DEU	DEU451-016	Hedelfinger	DEU	2
71	193	DEU	DEU451-017	Grafenburger	DEU	2
138	259	EST	EST012-001	Reelu	EST	3
139	260	EST	EST012-002	Madissoni Roosa	EST	3
140	261	EST	EST012-003	Veidenbergi Maguskirss	EST	3
141	262	EST	EST012-004	Helgi	EST	1
142	263	EST	EST012-005	Maia	EST	1
143	264	EST	EST012-006	Maardu Maguskirss	EST	1
144	265	EST	EST012-007	Kadrin	EST	3	Norri op
145	267	EST	EST012-009	Tiki	EST	3	Meelika
146	268	EST	EST012-010	Elle	EST	3	Juku op
147	269	EST	EST012-011	Piret	EST	3	Norri op
148	270	EST	EST012-012	Mupi	EST	3	Kati
149	271	EST	EST012-013	Arthur	EST	3	Krasavica (or Krasavitsa) op
150	273	EST	EST012-015	Tontu	EST	3	Norri op
151	274	EST	EST012-016	Meelika	EST	3	Leningradskaja Chernaja
152	275	EST	EST012-017	Anu	EST	3	Leningradskaja Chernaja
154	277	EST	EST012-019	Adelina	RUS	3	Slava Zhukova	Valerij Tchkalov
156	280	EST	EST012-022	Zorka	RUS	3	Ochsen Herzkirsche (or Golubinoe Serdtse)	Rumyaniye Schochki
157	281	EST	EST012-023	Jurgita	LTU	3	Hedelfingen	Dniprovka
153	282	EST	EST012-024	Leningradskaja Chernaja	RUS	3	Black Eagle	Tatarskaya Chornaya
158	27	FRA	FRA057-001	Valerij Chkalov	UKR	3	Kavkazshaya Rozozva op
159	28	FRA	FRA057-002	Bruelles	FRA	1
160	29	FRA	FRA057-003	Guigne Douce du Champ de l'air	FRA	1
161	30	FRA	FRA057-004	Bigarreau Maria Gaucher	FRA	1
162	31	FRA	FRA057-005	Hative de Bale	CHE	1
163	32	FRA	FRA057-006	Bigarreau Grand	FRA	1
164	33	FRA	FRA057-007	Etienne Thuilleaux	FRA	1
165	34	FRA	FRA057-008	Bigarreau Marmotte	FRA	1
25	35	FRA	FRA057-009	Bigarreau Moreau	FRA	2
166	36	FRA	FRA057-010	Merveille de Saint Genis Laval	FRA	1
167	37	FRA	FRA057-011	Bigarreau Noir d'Ecully	FRA	2
99	38	FRA	FRA057-012	Bigarreau Camus de Venasque#	FRA	1
168	40	FRA	FRA057-014	Saint Georges	FRA	1
169	41	FRA	FRA057-015	Cristobalina	ESP	1
170	42	FRA	FRA057-016	Blancale Precoce	FRA	1
171	43	FRA	FRA057-017	Olivette	FRA	1
172	44	FRA	FRA057-018	Bigarreau Hatif Burlat	FRA	2
173	46	FRA	FRA057-020	Bigarreau Cœur de Pigeon Tardif	FRA	1
174	47	FRA	FRA057-021	Xapata	FRA	1
175	48	FRA	FRA057-022	Bigarreau Coeur	FRA	1
176	49	FRA	FRA057-023	Blancale Tardive	FRA	1
177	51	FRA	FRA057-025	Versaillaise	FRA	1
178	53	FRA	FRA057-027	Bigarreau Saint Bruno	FRA	1
179	54	FRA	FRA057-028	Jerusalem	FRA	1
180	55	FRA	FRA057-029	Durette	FRA	1
10	57	FRA	FRA057-031	Regina	DEU	3	Schneiders Späte Knorpelkirsche	Rube
181	58	FRA	FRA057-032	Garnet	CAN	3
182	59	FRA	FRA057-033	Nanyo	JPN	3
183	60	FRA	FRA057-034	Cerna	ROU	3
184	61	FRA	FRA057-035	O.T.E.A	GRC	3
30	62	FRA	FRA057-036	Napoleon	DEU	2
185	63	FRA	FRA057-037	Kavics	HUN	3	Gemersdorfer Orias	Budakalaszi Helyi Fekete
186	64	FRA	FRA057-038	Glacier	USA	3	Stella	Burlat
187	65	FRA	FRA057-039	Van	CAN	3	Impératrice Eugénie op
188	66	FRA	FRA057-040	Uriase de Bistrita	ROU	3	Gemersdorfer	Hedelfingen
189	68	FRA	FRA057-042	Bing	USA	3	Black Republican op
190	69	FRA	FRA057-043	Mora di Cazzano	ITA	1
95	209	GBR	GBR30-001	Early Birchenhayes	GBR	2
76	210	GBR	GBR30-002	Hollander	NLD	1
43	211	GBR	GBR30-003	Ironsides	GBR	1
59	212	GBR	GBR30-005	Ronald's Heart	GBR	1
60	213	GBR	GBR30-006	Waterloo	GBR	2	Ambree	May Duke
96	214	GBR	GBR30-007	Burcombe	GBR	2
191	215	GBR	GBR30-008	Cryall's Seedling	GBR	1
2	216	GBR	GBR30-009	Early Rivers	GBR	2	Early Purple Guigne op
40	217	GBR	GBR30-010	Goodnestone Black	GBR	1
41	218	GBR	GBR30-011	Ham Green Black	GBR	1
192	219	GBR	GBR30-012	Merton Bigarreau	GBR	3	Knight's Early Black	Napoleon
103	220	GBR	GBR30-013	Merton Glory	GBR	3	Ursula Rivers	Noble
34	222	GBR	GBR30-015	Nutberry Black	GBR	2
193	107	GRC	GRC004	Lemonidi	GRC	1
194	108	GRC	GRC005	Mavro Proimo Vitalou	GRC	1
195	109	GRC	GRC006	Petrokeraso Tragano Axaias	GRC	1
196	111	GRC	GRC009	Tsolakeiko	GRC	1
197	112	GRC	GRC010	Tragana Edessis	GRC	1
198	113	GRC	GRC011	Vasiliadi	GRC	1
199	85	HRV	OK-1-HR	Okićka	HRV	1
6	126	HUN	NGYE-004	Fehér Cseresznye	HUN	1
200	128	HUN	NGYE-006	Fekete Helyi Sukoró	HUN	1
201	129	HUN	NGYE-007	Fekete Kőszemű	HUN	1
202	131	HUN	NGYE-009	Gyöngyösi Szívcseresznye	HUN	1
203	133	HUN	NGYE-011	Késői Helyi Fekete	HUN	1
131	134	HUN	NGYE-012	Késői Vadcseresznye	HUN	1
204	136	HUN	NGYE-015	Májusi Hosszúszárú	HUN	1
205	139	HUN	NGYE-018	Péceli Cseresznye	HUN	1
206	140	HUN	NGYE-019	Solymári Gömbölyű	HUN	1
207	143	HUN	NGYE-022	Torbágyi Késői	HUN	1
3	70	ITA	ITA380-163	Ferrovia	ITA	3
4	71	ITA	ITA380-201	Durone Nero II	ITA	1
208	72	ITA	ITA380-219	Durone Tardivo di Valstaffora	ITA	3
209	73	ITA	ITA380-299	Lucrezia	ITA	3	Vittoria	Breeding Selection (C.2.27.12)
210	74	ITA	ITA380-343	Giorgia	ITA	3	ISF 123 (breeding selection)	Caccianese
211	75	ITA	ITA380-347	Malizia	ITA	1
212	76	ITA	ITA380-491	Adriana	ITA	3	ISF 123 (breeding selection)	Mora di Cazzano
213	77	ITA	ITA380-500	Duroncino di Cesena	ITA	1
214	78	ITA	ITA380-502	Morena	ITA	1
215	79	ITA	ITA380-504	Durona di S. Giovanni	ITA	1
216	80	ITA	ITA380-506	Morandina	ITA	1
217	81	ITA	ITA380-508	Cornetta	ITA	2
218	82	ITA	ITA380-510	Fiore	ITA	1
8	83	ITA	ITA380-512	Gemella	ITA	1
219	283	LVA	LVA001001	Talsu 1	LVA	1
220	284	LVA	LVA001002	Strazdes Agrais	LVA	1
221	286	LVA	LVA001004	Vidzemes Sārtvaidzis	LVA	1
222	287	LVA	LVA001005	Indra	LVA	3
223	288	LVA	LVA001006	Aija	LVA	3
224	289	LVA	LVA001007	PU 14406	LVA	2
225	290	LVA	LVA001008	Balzams	LVA	3	Grosse Schwarze Knorpelkirsche	Germersdorfer Knorpelkirsche
226	291	LVA	LVA001009	Aleksandrs	LVA	3	Drogan's Gelbe Knorpelkirsche	local cherry
227	292	LVA	LVA001010	Iedzēnu Dzeltenais	LVA	3
228	294	LVA	LVA001012	Agris	LVA	3	Fromm's Schwarze Herzkirsche
229	295	LVA	LVA001013	AM 24-10-22	LVA	2
230	296	LVA	LVA001014	Paula	LVA	3	Krupnoplodnaya
231	297	LVA	LVA001015	Artis	LVA	3	Krupnoplodnaya
232	298	LVA	LVA001016	Leningradskaja Chornaya	RUS	3	Black Eagle	Tatarskaya Chornaya
233	299	LVA	LVA001017	Bryanskaya Rozovaya	RUS	3	Muskatnaya Chornaya
155	300	LVA	LVA001018	Iputj	RUS	3	(Leningradskaya Chornaya x Pobeda)	seedling of Jabule
234	301	LVA	LVA001019	Tyutchevka	RUS	3	Bryansk 3-36	Krasnaya Plotnaya
235	302	LVA	LVA001020	Radica	RUS	3	Leningradskaya Chornaya	Komunarka
236	303	LVA	LVA001021	Ovstuzhenka	RUS	3	Kompaktnaya Venyaminova	Leningradskaya Chornaya
237	304	LVA	LVA001022	Kompaktnaya Venyaminova	RUS	3	Leningradskaya Chornaya
238	305	LVA	LVA001023	Valerij Tchkalov	UKR	3	Kavkazskaya Rozovaja
239	306	LVA	LVA001024	Donecky 24-37	UKR	3
15	307	LVA	LVA001025	Krupnoplodnaya	UKR	3	Napoleon
240	308	LVA	LVA001026	Donchanka	UKR	3	Drogans Gelbe Knorpelkirsche
241	309	LVA	LVA001027	Aelita	UKR	3	Drogans Gelbe Knorpelkirsche
18	310	LVA	LVA001028	Ugoljok	UKR	3	Drogans Gelbe Knorpelkirsche	Valerij Tchkalov
242	311	LVA	LVA001029	Mindauge	LTU	3	Severnaya	Jurgita
243	312	LVA	LVA001030	Agila	LTU	3	Leningradskaya Chornaya	Priusadebnaya
11	313	LVA	LVA001031	Auste	LTU	3	Hedelfingen	Rožinė
244	314	LVA	LVA001032	Vytenu Juodoji	LTU	3	Žemaičiu raudonoji	Dniprovka
245	3	MAR	Mor003	BA	MARµ	NA
246	15	MAR	Mor015	S12	MARµ	NA
248	224	NOR	411	Aga	NOR	1
7	225	NOR	401	Alvsaker	NOR	1
249	226	NOR	103	Giant	USA	2
251	230	NOR	110	Torblå	NOR	1
252	233	NOR	108	Kunze	DEU	2
27	234	NOR	005	Kvit Spansk	NORµ	1
253	236	NOR	505	Napoleon	DEU	2
254	237	NOR	304	Osabaer	NOR	1
255	238	NOR	607	Jorunn Os morell	NOR	1
256	239	NOR	210	Berny	FRA	2
44	240	NOR	408	Emperor Francis	AUS	2
257	241	NOR	511	Svart Spansk	NORµ	2
258	242	NOR	008	Schmidt	DEU	3	Gross Schwarze Knorpelkirsche op
259	244	NOR	105	Sue	CAN	3	Bing	Schmidt
260	245	NOR	611	Tolleiv	NOR	1
74	246	NOR	605	Coe's Transparent	USA	2
261	249	NOR	307	Victor	CAN	3	Windsor op
46	250	NOR	203	Werder	DEU	2
101	19	PRT	INIAV-100	Francesa Alenquer	PRT	2
99	22	PRT	INIAV-103	De Saco#	PRT	2
247	26	PRT	INIAV-107	Lisboeta	PRT	2
262	115	ROU	RORSFGI-002	Galata	ROU	3
263	116	ROU	RORSFGI-003	Maxut	ROU	3
250	117	ROU	RORSFGI-004	Basicate	ROU	2	selections of indigenous old cultivars
264	118	ROU	RORSFGI-005	Draganele de Pitesti	ROU	2	selections of indigenous old cultivars
265	119	ROU	RORSFGI-006	Bucium	ROU	3	Van	Boambe de Cotnari
266	120	ROU	RORSFGI-007	Ludovic	ROU	3	Van	Boambe de Cotnari
267	121	ROU	RORSFGI-008	Andrei	ROU	3	Pietroase Negre de Odessa o.p.	Boambe de Cotnari
268	122	ROU	RORSFGI-009	Daria	ROU	3	Boambe de Cotnari	Thurn und Taxis
269	159	SVK	SVK001001	Cachtice 3	SVK	1
3	161	SVK	SVK001003	Cachtice 6$	SVK	1
270	165	SVK	SVK001007	Brdarka 245	SVK	1
271	166	SVK	SVK001008	Brdarka 311	SVK	1
272	251	SWE	BAL507	Almore	SWE	3	Napoleon	Frogmore
20	253	SWE	BAL519	Gårdebo	SWE	2
24	254	SWE	BAL523	Hedemora	SWE	2
273	255	SWE	BAL525	Heidi	SWE	3	Allmän gulröd bigarrå	Büttners Rote Späte
31	256	SWE	BAL529	Huldra	SWE	3	Allmän gulröd bigarrå	Erianne
274	257	SWE	BAL607	Mahogny Från Näsum	SWE	2
275	258	SWE	BAL903	Kerstins Från Djupekås	SWE	1
£	CHUNQ=CHerry UNiQue genotype code, following a similar approach proposed by the European Malus community [31, 45, 46]
§	in bold the accession representing each group of duplicates
#	found identical in Ordrige et al alignment study [9] but not in this one
$	found identical to accessions from matching group 3 in Ordrige et al alignment study [9] but not to the accessions of the corresponding matching group 40 in this study
&	two different countries reported as origin country in the litterature
µ	as origin country of the accession is unknown here country of the collection which maintained the accession is indicated
op	open pollination

## Sheet: Table S3
Number in the study	Country of the collection	Accession Code	Accession Name§	Origin country&	Status	Number of Rare alleles (Private alleles)
					1=landrace
					2= early selection
					3=modern breeding
28	AUT	BOKU-003	Sämling aus Sauerbrunn	AUT	1	1
29	BEL	BEL19-CRAW-008	Rouge Dorée	BEL	1	1
33	BEL	BEL19-CRAW-010	Guigne Presgaux 2	BEL	1	1
37	BIH	BiH039-196	Alica	BIH	1	3
38	BIH	BiH039-197	Divlja Crna	BIH	1	1 (1)
40	BIH	BiH039-203	Hašlama	BIH	1	2
41	BIH	BiH039-205	Banjalučka Crnica	BIH	1	1
47	BIH	BiH039-209	Ašlamka	BIH	1	2
55	CZE	10F014	Těchlovická	CZE	1	1
61	CZE	10F015	Žalanka	CZE	1	4 (2)
75	DEU	DEU451-002	Dolleseppler	DEU	3	1
91	EST	EST012-006	Maardu Maguskirss	EST	1	1 (1)
92	EST	EST012-012	Mupi	EST	3	1 (1)
98	FRA	FRA057-002	Bruelles	FRA	1	1
99	FRA	FRA057-003	Guigne Douce du Champ de l'air	FRA	1	1
103	FRA	FRA057-007	Etienne Thuilleaux	FRA	1	1
107	FRA	FRA057-011	Bigarreau Noir d'Ecully	FRA	2	1
108	FRA	FRA057-012	Bigarreau Camus de Venasque	FRA	1	2
111	FRA	FRA057-014	Saint Georges	FRA	1	3 (2)
112	FRA	FRA057-015	Cristobalina	ESP	1	4
113	FRA	FRA057-021	Xapata	FRA	1	2 (1)
115	FRA	FRA057-029	Durette	FRA	1	2
116	FRA	FRA057-035	O.T.E.A	GRC	3	2
118	GBR	GBR30-002	Hollander	NLD	1	1
122	GBR	GBR30-008	Cryall's Seedling	GBR	1	1 (1)
133	GBR	GBR30-010	Goodnestone Black	GBR	1	1
136	GRC	GRC004	Lemonidi	GRC	1	2
157	GRC	GRC005	Mavro Proimo Vitalou	GRC	1	2
158	GRC	GRC009	Tsolakeiko	GRC	1	1
161	GRC	GRC010	Tragana Edessis	GRC	1	2
165	GRC	GRC011	Vasiliadi	GRC	1	1
171	HUN	NGYE-011	Késői Helyi Fekete	HUN	1	1
178	HUN	NGYE-015	Májusi Hosszúszárú	HUN	1	1
166	ITA	ITA380-347	Malizia	ITA	1	7 (6)
283	LVA	LVA001001	Talsu 1	LVA	1	1 (1)
284	LVA	LVA001002	Strazdes Agrais	LVA	1	1
287	LVA	LVA001005	Indra	LVA	3	1
295	LVA	LVA001013	AM 24-10-22	LVA	2	1
299	LVA	LVA001017	Bryanskaya Rozovaya	RUS	3	1 (1)
309	LVA	LVA001027	Aelita	UKR	3	1
312	LVA	LVA001030	Agila	LTU	3	1
314	LVA	LVA001032	Vytenu Juodoji	LTU	3	1 (1)
254	NOR	607	Jorunn Os morell	NOR	1	1
256	NOR	511	Svart Spansk	NA	2	2
200	ROU	RORSFGI-002	Galata	ROU	3	4(2)
202	ROU	RORSFGI-003	Maxut	ROU	3	4
210	ROU	RORSFGI-005	Draganele de Pitesti	ROU	2	3 (1)
215	ROU	RORSFGI-009	Daria	ROU	3	1 (1)
217	SVK	SVK001003	Cachtice 6	SVK	1	1
238	SVK	SVK001007	Brdarka 245	SVK	1	5
241	SVK	SVK001008	Brdarka 311	SVK	1	2 (1)
257	SWE	BAL523	Hedemora	SWE	2	2 (1)
264	SWE	BAL529	Huldra	SWE	3	1
270	SWE	BAL607	Mahogny Från Näsum	SWE	2	1

## Sheet:  Table S4
Landraces									Early Selec&Modern
Locus	N	Na	PIC	Ho	He	Fis	HW		Locus	N	Na	PIC	Ho	He	Fis	HW
BPPCT034	104	14	0.807	0.942	0.832	-0.0699	NS		BPPCT034	111	12	0.757	0.973	0.784	-0.1351	***
BPPCT037	104	10	0.81	0.827	0.836	0.0045	NS		BPPCT037	111	8	0.779	0.883	0.811	-0.0465	NS
CPPCT006	104	11	0.73	0.779	0.77	-0.0094	NS		CPPCT006	111	10	0.75	0.784	0.784	-0.0002	NS
CPPCT022	104	8	0.654	0.673	0.706	0.025	NS		CPPCT022	111	7	0.562	0.604	0.622	0.0211	NS
CPSCT038	103	6	0.615	0.67	0.68	0.0064	NS		CPSCT038	111	5	0.505	0.622	0.554	-0.0616	NS
EMPa002	102	3	0.36	0.461	0.456	-0.012	NS		EMPa002	111	4	0.368	0.631	0.472	-0.1465	**
EMPa004	104	11	0.685	0.721	0.735	0.0041	NS		EMPa004	110	7	0.664	0.736	0.72	-0.0123	NS
EMPa017	104	9	0.372	0.356	0.397	0.0573	NS		EMPa017	111	7	0.324	0.333	0.352	0.0143	ND
EMPa018	104	13	0.636	0.615	0.667	0.0315	NS		EMPa018	111	10	0.629	0.595	0.678	0.0618	NS
EMPaS02	104	8	0.777	0.74	0.805	0.0441	NS		EMPaS02	111	7	0.769	0.802	0.802	-0.0032	NS
EMPaS06	104	10	0.831	0.837	0.854	0.0083	ND		EMPaS06	111	10	0.833	0.874	0.855	-0.0144	NS
EMPaS12	104	9	0.743	0.788	0.782	-0.0106	NS		EMPaS12	111	5	0.713	0.775	0.76	-0.013	NS
EMPaS14	104	6	0.535	0.635	0.588	-0.0454	NS		EMPaS14	111	4	0.546	0.658	0.624	-0.03	NS
PAV-Rf-SSR	104	9	0.704	0.731	0.741	0.0005	NS		PAV-Rf-SSR	111	6	0.748	0.838	0.784	-0.0362	NS
Total		127							Total		102
mean		9.07	0.6614	0.698	0.7037	0.00831667			mean		7.286	0.6391	0.722	0.6858	-0.01835

## Sheet:  Table S5
K	Reps	Mean LnP(K)	Stdev LnP(K)	Ln'(K)	|Ln''(K)|	Delta K
1	10	-9221	0.1414	NA	NA	NA
2	10	-8934.54	21.9702	286.46	96.3	4.38321
3	10	-8744.38	4.2729	190.16	6.16	1.44166
4	10	-8560.38	3.4127	184	91.14	26.7065
5	10	-8467.52	3.0382	92.86	9.52	3.13343
6	10	-8384.18	3.8626	83.34	4.58	1.18573
7	10	-8305.42	6.2501	78.76	7.28	1.16478
8	10	-8233.94	14.4683	71.48	34.75	2.4018
9	10	-8197.21	14.9855	36.73	2.6	0.173501
10	10	-8163.08	13.2966	34.13	34.97	2.63
11	10	-8163.92	39.9591	-0.84	45.83	1.14692
12	10	-8118.93	25.8306	44.99	127.99	4.95498
13	10	-8201.93	84.783	-83	78.82	0.929668
14	10	-8206.11	58.0039	-4.18	101.01	1.74144
15	10	-8311.3	135.126	-105.19	25.2	0.186493
16	10	-8391.29	163.322	-79.99	31.43	0.192442
17	10	-8439.85	124.718	-48.56	169.43	1.3585
18	10	-8657.84	225.015	-217.99	297.77	1.32333
19	10	-8578.06	133.292	79.78	NA	NA

## Sheet:  Table S6
CHUNQ£	Number in the study	Country of the collection	Accession Code	Accession Name§	Origin country&	Status	Pedigree		Structure
						1=landrace	Parent 1	Parent 2
						2= early selection			K=4
						3=modern breeding			Cluster (membership coefficient>0.80)	Cluster (0.80<membership coefficient > 0.55)
109	169	AUT	BOKU-001	Donnerskircher Blaukirsche	AUT	1			admix	admix
110	170	AUT	BOKU-002	Schartner Rainkirsche	AUT	1			admix	admix
111	171	AUT	BOKU-003	Sämling aus Sauerbrunn	AUT	1			admix	2
112	172	AUT	BOKU-004	Marzer Kirsche	AUT	1			admix	admix
113	195	BEL	BEL19-CRAW-001	Helshoven	BEL	1			admix	3
114	196	BEL	BEL19-CRAW-002	Bigarreau Ghijssens	BEL	1			admix	1
115	198	BEL	BEL19-CRAW-004	Abbesse de Mouland	BEL	1			admix	admix
116	199	BEL	BEL19-CRAW-007	Pirette de Biercée	BEL	1			admix	3
117	200	BEL	BEL19-CRAW-008	Rouge Dorée	BEL	1			admix	admix
119	201	BEL	BEL19-CRAW-009	Cerise de Lignette	BEL	1			admix	3
120	202	BEL	BEL19-CRAW-010	Guigne Presgaux 2	BEL	1			admix	3
121	204	BEL	BEL19-CRAW-012	Cerise Brunin	BEL	1			admix	admix
22	205	BEL	BEL19-CRAW-013	Cerise Proces	BEL	1			3	3
122	86	BIH	BiH039-116	Bijeli Triješanj	BIH	1			admix	2
77	88	BIH	BiH039-193	Rani Hrušt	BIH	1			admix	2
118	90	BIH	BiH039-195	Grki Hrušt	BIH	1			admix	3
123	91	BIH	BiH039-196	Alica	BIH	1			admix	admix
124	92	BIH	BiH039-197	Divlja Crna	BIH	1			admix	2
125	96	BIH	BiH039-201	Bijela Hašlama	BIH	1			admix	admix
126	98	BIH	BiH039-203	Hašlama	BIH	1			admix	2
127	99	BIH	BiH039-205	Banjalučka Crnica	BIH	1			admix	2
128	100	BIH	BiH039-206	Cipov	BIH	1			admix	3
129	103	BIH	BiH039-209	Ašlamka	BIH	1			admix	admix
1	144	CZE	10F001	Černá Špička	CZE	1			admix	3
28	145	CZE	10F002	Granát	CZE	1			admix	admix
13	147	CZE	10F004	Chlumecká černá Chrupka	CZE	1			admix	3
130	148	CZE	10F005	Karešova Raná	CZE	1			admix	admix
21	150	CZE	10F007	Kordia	CZE	2			1	1
132	152	CZE	10F009	Libědjovická raná	CZE	1			admix	admix
133	153	CZE	10F010	Pivka	CZE	1			admix	4
134	154	CZE	10F011	Pivovka	CZE	1			admix	admix
5	155	CZE	10F012	Přeúrodná Srdcovka	CZE	1			admix	1
135	156	CZE	10F013	Švestičková	FRA	1			admix	admix
136	157	CZE	10F014	Těchlovická	CZE	1			admix	3
137	158	CZE	10F015	Žalanka	CZE	1			admix	2
90	178	DEU	DEU451-002	Dolleseppler	DEU	3			admix	admix
29	179	DEU	DEU451-003	Früheste der Mark	DEU/FRA&	2			admix	admix
9	181	DEU	DEU451-005	Drogans Gelbe Knorpelkirsche	DEU	2			admix	4
84	182	DEU	DEU451-006	Kassins Frühe	DEU	2			admix	admix
32	183	DEU	DEU451-007	Knauffs Schwarze	DEU	2			admix	3
85	184	DEU	DEU451-008	Kronprinz von Hannover	DEU	2			admix	admix
89	185	DEU	DEU451-009	Leipziger Lotkirsche	DEU	2			admix	admix
86	186	DEU	DEU451-010	Lommatzscher Glasierte	DEU	2			admix	admix
87	187	DEU	DEU451-011	Nafrina	DEU	3	Werdersche Frühe	Büttners Rote Knorpelkirsche	admix	3
39	190	DEU	DEU451-014	Teickners Schwarze Herzkirsche	DEU	2			admix	3
88	191	DEU	DEU451-015	Schöne von Marienhöhe	DEU	2			admix	admix
23	192	DEU	DEU451-016	Hedelfinger	DEU	2			admix	3
71	193	DEU	DEU451-017	Grafenburger	DEU	2			admix	4
138	259	EST	EST012-001	Reelu	EST	3			admix	4
139	260	EST	EST012-002	Madissoni Roosa	EST	3			admix	admix
140	261	EST	EST012-003	Veidenbergi Maguskirss	EST	3			4	4
141	262	EST	EST012-004	Helgi	EST	1			admix	4
142	263	EST	EST012-005	Maia	EST	1			4	4
143	264	EST	EST012-006	Maardu Maguskirss	EST	1			admix	4
144	265	EST	EST012-007	Kadrin	EST	3	Norri op		4	4
145	267	EST	EST012-009	Tiki	EST	3	Meelika		admix	4
146	268	EST	EST012-010	Elle	EST	3	Juku op		admix	4
147	269	EST	EST012-011	Piret	EST	3	Norri op		4	4
148	270	EST	EST012-012	Mupi	EST	3	Kati		4	4
149	271	EST	EST012-013	Arthur	EST	3	Krasavica (or Krasavitsa) op		4	4
150	273	EST	EST012-015	Tontu	EST	3	Norri op		admix	4
151	274	EST	EST012-016	Meelika	EST	3	Leningradskaja Chernaja		4	4
152	275	EST	EST012-017	Anu	EST	3	Leningradskaja Chernaja		admix	4
154	277	EST	EST012-019	Adelina	RUS	3	Slava Zhukova	Valerij Tchkalov	admix	admix
156	280	EST	EST012-022	Zorka	RUS	3	Ochsen Herzkirsche (or Golubinoe Serdtse	Rumyaniye Schochki	4	4
157	281	EST	EST012-023	Jurgita	LTU	3	Hedelfingen	Dniprovka	admix	admix
153	282	EST	EST012-024	Leningradskaja Chernaja	RUS	3	Black Eagle	Tatarskaya Chornaya	admix	4
158	27	FRA	FRA057-001	Valerij Chkalov	UKR	3	Kavkazskaya Rozozva op		admix	admix
159	28	FRA	FRA057-002	Bruelles	FRA	1			admix	2
160	29	FRA	FRA057-003	Guigne Douce du Champ de l'air	FRA	1			admix	3
161	30	FRA	FRA057-004	Bigarreau Maria Gaucher	FRA	1			admix	admix
162	31	FRA	FRA057-005	Hative de Bale	FRA	1			admix	3
163	32	FRA	FRA057-006	Bigarreau Grand	FRA	1			admix	2
164	33	FRA	FRA057-007	Etienne Thuilleaux	FRA	1			admix	2
165	34	FRA	FRA057-008	Bigarreau Marmotte	FRA	1			3	3
25	35	FRA	FRA057-009	Bigarreau Moreau	FRA	2			admix	1
166	36	FRA	FRA057-010	Merveille de Saint Genis Laval	FRA	1			admix	admix
167	37	FRA	FRA057-011	Bigarreau Noir d'Ecully	FRA	2			admix	2
99	38	FRA	FRA057-012	Bigarreau Camus de Venasque	FRA	1			1	1
168	40	FRA	FRA057-014	Saint Georges	FRA	1			2	2
169	41	FRA	FRA057-015	Cristobalina	ESP	1			2	2
170	42	FRA	FRA057-016	Blancale Precoce	FRA	1			2	2
171	43	FRA	FRA057-017	Olivette	FRA	1			admix	admix
172	44	FRA	FRA057-018	Bigarreau Hatif Burlat	FRA	2			admix	1
173	46	FRA	FRA057-020	Bigarreau Cœur de Pigeon Tardif	FRA	1			2	2
174	47	FRA	FRA057-021	Xapata	FRA	1			2	2
175	48	FRA	FRA057-022	Bigarreau Coeur	FRA	1			admix	admix
176	49	FRA	FRA057-023	Blancale Tardive	FRA	1			admix	admix
177	51	FRA	FRA057-025	Versaillaise	FRA	1			admix	1
178	53	FRA	FRA057-027	Bigarreau Saint Bruno	FRA	1			admix	1
179	54	FRA	FRA057-028	Jerusalem	FRA	1			admix	2
180	55	FRA	FRA057-029	Durette	FRA	1			2	2
10	57	FRA	FRA057-031	Regina	DEU	3	Schneiders Späte Knorpelkirsche	Rube	admix	admix
181	58	FRA	FRA057-032	Garnet	CAN	3			admix	1
182	59	FRA	FRA057-033	Nanyo	JPN	3			admix	1
183	60	FRA	FRA057-034	Cerna	ROU	3			admix	admix
184	61	FRA	FRA057-035	O.T.E.A	GRC	3			admix	admix
30	62	FRA	FRA057-036	Napoleon	DEU	2			admix	3
185	63	FRA	FRA057-037	Kavics	HUN	3	Gemersdorfer Orias	Budakalaszi Helyi Fekete	admix	admix
186	64	FRA	FRA057-038	Glacier	USA	3	Stella	Burlat	admix	1
187	65	FRA	FRA057-039	Van	CAN	3	Impératrice Eugénie op		admix	1
188	66	FRA	FRA057-040	Uriase de Bistrita	ROU	3	Gemersdorfer	Hedelfingen	admix	admix
189	68	FRA	FRA057-042	Bing	USA	3	Black Republican op		admix	admix
190	69	FRA	FRA057-043	Mora di Cazzano	ITA	1			1	1
95	209	GBR	GBR30-001	Early Birchenhayes	GBR	2			2	2
76	210	GBR	GBR30-002	Hollander	NLD	1			admix	2
43	211	GBR	GBR30-003	Ironsides	GBR	1			admix	admix
59	212	GBR	GBR30-005	Ronald's Heart	GBR	1			admix	4
60	213	GBR	GBR30-006	Waterloo	GBR	2	Ambree	May Duke	admix	4
96	214	GBR	GBR30-007	Burcombe	GBR	2			admix	2
191	215	GBR	GBR30-008	Cryall's Seedling	GBR	1			admix	2
2	216	GBR	GBR30-009	Early Rivers	GBR	2	Early Purple Guigne op		admix	3
40	217	GBR	GBR30-010	Goodnestone Black	GBR	1			admix	3
41	218	GBR	GBR30-011	Ham Green Black	GBR	1			admix	3
192	219	GBR	GBR30-012	Merton Bigarreau	GBR	3	Knight's Early Black	Napoleon	admix	1
103	220	GBR	GBR30-013	Merton Glory	GBR	3	Ursula Rivers	Noble	admix	1
34	222	GBR	GBR30-015	Nutberry Black	GBR	2			admix	admix
193	107	GRC	GRC004	Lemonidi	GRC	1			admix	admix
194	108	GRC	GRC005	Mavro Proimo Vitalou	GRC	1			admix	2
195	109	GRC	GRC006	Petrokeraso Tragano Axaias	GRC	1			admix	3
196	111	GRC	GRC009	Tsolakeiko	GRC	1			admix	admix
197	112	GRC	GRC010	Tragana Edessis	GRC	1			2	2
198	113	GRC	GRC011	Vasiliadi	GRC	1			admix	admix
199	85	HRV	OK-1-HR	Okićka	HRV	1			admix	3
6	126	HUN	NGYE-004	Fehér Cseresznye	HUN	1			admix	4
200	128	HUN	NGYE-006	Fekete Helyi Sukoró	HUN	1			admix	3
201	129	HUN	NGYE-007	Fekete Kőszemű	HUN	1			1	1
202	131	HUN	NGYE-009	Gyöngyösi Szívcseresznye	HUN	1			admix	3
203	133	HUN	NGYE-011	Késői Helyi Fekete	HUN	1			admix	3
131	134	HUN	NGYE-012	Késői Vadcseresznye	HUN	1			admix	2
204	136	HUN	NGYE-015	Májusi Hosszúszárú	HUN	1			admix	3
205	139	HUN	NGYE-018	Péceli Cseresznye	HUN	1			admix	2
206	140	HUN	NGYE-019	Solymári Gömbölyű	HUN	1			3	3
207	143	HUN	NGYE-022	Torbágyi Késői	HUN	1			3	3
3	70	ITA	ITA380-163	Ferrovia	ITA	3			admix	1
4	71	ITA	ITA380-201	Durone Nero II	ITA	1			1	1
208	72	ITA	ITA380-219	Durone Tardivo di Valstaffora	ITA	3			1	1
209	73	ITA	ITA380-299	Lucrezia	ITA	3	Vittoria	Breeding Selection (C.2.27.12)	admix	admix
210	74	ITA	ITA380-343	Giorgia	ITA	3	ISF 123 (breeding selection)	Caccianese	admix	1
211	75	ITA	ITA380-347	Malizia	ITA	3			2	2
212	76	ITA	ITA380-491	Adriana	ITA	3	ISF 123 (breeding selection)	Mora di Cazzano	admix	1
213	77	ITA	ITA380-500	Duroncino di Cesena	ITA	1			1	1
214	78	ITA	ITA380-502	Morena	ITA	1			1	1
215	79	ITA	ITA380-504	Durona di S. Giovanni	ITA	1			1	1
216	80	ITA	ITA380-506	Morandina	ITA	1			1	1
217	81	ITA	ITA380-508	Cornetta	ITA	2			1	1
218	82	ITA	ITA380-510	Fiore	ITA	1			1	1
8	83	ITA	ITA380-512	Gemella	ITA	1			admix	3
219	283	LVA	LVA001001	Talsu 1	LVA	1			admix	2
220	284	LVA	LVA001002	Strazdes Agrais	LVA	1			admix	2
221	286	LVA	LVA001004	Vidzemes Sārtvaidzis	LVA	1			4	4
222	287	LVA	LVA001005	Indra	LVA	3			admix	2
223	288	LVA	LVA001006	Aija	LVA	3			admix	admix
224	289	LVA	LVA001007	PU 14406	LVA	2			admix	admix
225	290	LVA	LVA001008	Balzams	LVA	3	Grosse Schwarze Knorpelkirsche	Germersdorfer Knorpelkirsche	admix	admix
226	291	LVA	LVA001009	Aleksandrs	LVA	3	Drogan's Gelbe Knorpelkirsche	local cherry	admix	4
227	292	LVA	LVA001010	Iedzēnu Dzeltenais	LVA	3			admix	4
228	294	LVA	LVA001012	Agris	LVA	3	Fromm's Schwarze Herzkirsche		admix	admix
229	295	LVA	LVA001013	AM 24-10-22	LVA	2			admix	admix
230	296	LVA	LVA001014	Paula	LVA	3	Krupnoplodnaya		admix	4
231	297	LVA	LVA001015	Artis	LVA	3	Krupnoplodnaya		admix	admix
232	298	LVA	LVA001016	Leningradskaja Chornaya	RUS	3	Black Eagle	Tatarskaya Chornaya	4	4
233	299	LVA	LVA001017	Bryanskaya Rozovaya	RUS	3	Muskatnaya Chornaya		admix	4
155	300	LVA	LVA001018	Iputj	RUS	3	(Leningradskaya Chornaya x Pobeda)	seedling of Jabule	4	4
234	301	LVA	LVA001019	Tyutchevka	RUS	3	Bryansk 3-36	Krasnaya Plotnaya	admix	admix
235	302	LVA	LVA001020	Radica	RUS	3	Leningradskaya Chornaya	Komunarka	4	4
236	303	LVA	LVA001021	Ovstuzhenka	RUS	3	Kompaktnaya Venyaminova	Leningradskaya Chornaya	admix	4
237	304	LVA	LVA001022	Kompaktnaya Venyaminova	RUS	3	Leningradskaya Chornaya		admix	4
238	305	LVA	LVA001023	Valerij Tchkalov	UKR	3	Kavkazskaya Rozovaja		admix	admix
239	306	LVA	LVA001024	Donecky 24-37	UKR	3			admix	admix
15	307	LVA	LVA001025	Krupnoplodnaya	UKR	3	Napoleon		admix	admix
240	308	LVA	LVA001026	Donchanka	UKR	3	Drogans Gelbe Knorpelkirsche		admix	admix
241	309	LVA	LVA001027	Aelita	UKR	3	Drogans Gelbe Knorpelkirsche		admix	admix
18	310	LVA	LVA001028	Ugoljok	UKR	3	Drogans Gelbe Knorpelkirsche	Valerij Tchkalov	admix	3
242	311	LVA	LVA001029	Mindauge	LTU	3	Severnaya	Jurgita	admix	admix
243	312	LVA	LVA001030	Agila	LTU	3	Leningradskaya Chornaya	Priusadebnaya	admix	admix
11	313	LVA	LVA001031	Auste	LTU	3	Hedelfingen	Rožinė	admix	1
244	314	LVA	LVA001032	Vytenu Juodoji	LTU	3	Žemaičiu raudonoji	Dniprovka	admix	admix
245	3	MAR	Mor003	BA	MARµ	NA			admix	admix1
246	15	MAR	Mor015	S12	MARµ	NA			admix	admix
248	224	NOR	411	Aga	NOR	1			admix	admix
7	225	NOR	401	Alvsaker	NOR	1			admix	admix
249	226	NOR	103	Giant	USA	2			admix	3
251	230	NOR	110	Torblå	NOR	1			admix	admix
252	233	NOR	108	Kunze	DEU	2			admix	admix
27	234	NOR	005	Kvit Spansk	NORµ	1			admix	admix
253	236	NOR	505	Napoleon	DEU	2			admix	admix
254	237	NOR	304	Osabaer	NOR	1			3	3
255	238	NOR	607	Jorunn Os morell	NOR	1			admix	admix
256	239	NOR	210	Berny	FRA	2			admix	admix
44	240	NOR	408	Emperor Francis	DEU/AUT&	2			admix	3
257	241	NOR	511	Svart Spansk	NORµ	2			admix	2
258	242	NOR	008	Schmidt	DEU	3	Gross Schwarze Knorpelkirsche op		admix	admix
259	244	NOR	105	Sue	CAN	3	Bing	Schmidt	admix	admix
260	245	NOR	611	Tolleiv	NOR	1			admix	3
74	246	NOR	605	Coe's Transparent	USA	2			admix	admix
261	249	NOR	307	Victor	CAN	3	Windsor op		admix	1
46	250	NOR	203	Werder	DEU	2			admix	admix
101	19	PRT	INIAV-100	Francesa Alenquer	PRT	2			admix	3
99	22	PRT	INIAV-103	De Saco	PRT	2			1	1
247	26	PRT	INIAV-107	Lisboeta	PRT	2			2	2
262	115	ROU	RORSFGI-002	Galata	ROU	3			2	2
263	116	ROU	RORSFGI-003	Maxut	ROU	3			2	2
250	117	ROU	RORSFGI-004	Basicate	ROU	2	selections of indigenous old cultivars		admix	4
264	118	ROU	RORSFGI-005	Draganele de Pitesti	ROU	2	selections of indigenous old cultivars		admix	2
265	119	ROU	RORSFGI-006	Bucium	ROU	3	Van	Boambe de Cotnari	admix	admix
266	120	ROU	RORSFGI-007	Ludovic	ROU	3	Van	Boambe de Cotnari	admix	1
267	121	ROU	RORSFGI-008	Andrei	ROU	3	Pietroase Negre de Odessa o.p.	Boambe de Cotnari	1	1
268	122	ROU	RORSFGI-009	Daria	ROU	3	Boambe de Cotnari	Thurn und Taxis	admix	1
269	159	SVK	SVK001001	Cachtice 3	SVK	1			admix	admix
3	161	SVK	SVK001003	Cachtice 6	SVK	1			admix	1
270	165	SVK	SVK001007	Brdarka 245	SVK	1			2	2
271	166	SVK	SVK001008	Brdarka 311	SVK	1			2	2
272	251	SWE	BAL507	Almore	SWE	3	Napoleon	Frogmore	3	3
20	253	SWE	BAL519	Gårdebo	SWE	2			admix	admix
24	254	SWE	BAL523	Hedemora	SWE	2			admix	2
273	255	SWE	BAL525	Heidi	SWE	3	Allmän gulröd bigarrå	Büttners Rote Späte	admix	1
31	256	SWE	BAL529	Huldra	SWE	3	Allmän gulröd bigarrå	Erianne	admix	admix
274	257	SWE	BAL607	Mahogny Från Näsum	SWE	2			admix	admix
275	258	SWE	BAL903	Kerstins Från Djupekås	SWE	1			admix	3
£	CHUNQ=CHerry UNiQue genotype code, following a similar approach proposed by the European Malus community [31, 45, 46]
§	in bold the accession representing each group of duplicates
&	two different countries reported as origin country in the litterature
µ	as origin country of the accession is unknown here country of the collection which maintained the accession is indicated
op	open pollination

## Sheet: Table S7
Average distances (expected heterozygosity) between individuals in same cluster:
calculated with STRUCTURE
cluster 1	0.5304
cluster 2	0.7476
cluster 3	0.5483
cluster 4	0.5844

## Sheet:  Table S8
Cluster	sub-cluster	sub group	N° in this study	Accession Name	Origin Country	Parent 1	Parent 2	Status
I	1	a	79	Durona di S. Giovanni	ITA			1
			71	Durone Nero II	ITA			1
			78	Morena	ITA			1
			82	Fiore	ITA			1
			81	Cornetta	ITA			2
			77	Duroncino di Cesena	ITA			1
			72	Durone Tardivo di Valstaffora	ITA			1
			150	Kordia	CZE			2
			80	Morandina	ITA			1
			76	Adriana	ITA	ISF 123 (breeding selection)	Mora di Cazzano	3
			129	Fekete Kőszemű	HUN			1
			69	Mora di Cazzano	ITA			1
			38	Bigarreau Camus de Venasque	FRA			1
			22	De Saco	PRT			2
			219	Merton Bigarreau	GBR	Knight's Early Black	Napoleon	3
			74	Giorgia	ITA	ISF 123 (breeding selection)	Caccianese	3
			145	Granát	CZE			1
			60	Cerna	ROU			3
		b	121	Andrei	ROU	Pietroase Negre de Odessa	Boambe de Cotnari	3
			120	Ludovic	ROU	Van	Boambe de Cotnari	3
			294	Agris	LVA	Fromm's Schwarze Herzkirsche		3
			313	Auste	LTU	Hedelfingen	Rožinė	3
			307	Krupnoplodnaya	UKR	Napoleon op		3
			306	Donecky 24-37	UKR			3
			65	Van	CAN	Impératrice Eugénie op		3
			58	Garnet	CAN			3
			249	Victor	CAN	Windsor op		3
			196	Bigarreau Ghijssens	BEL			1
			255	Heidi	SWE	Allmän gulröd bigarrå	Büttners Rote Späte	3
			240	Emperor Francis	AUT/DEU			2
			152	Libědjovická raná	CZE			1
			122	Daria	ROU	Boambe de Cotnari	Thurn und Taxis	3
			119	Bucium	ROU	Van	Boambe de Cotnari	3
	2		312	Agila	LTU	Leningradskaya Chornaya	Priusadebnaya	3
			220	Merton Glory	GBR	Ursula Rivers	Noble	3
			15	S12	MARµ			NA
II	1	a	218	Ham Green Black	GBR			1
			29	Guigne Douce du Champ de l’air	FRA			1
			258	Kerstins Från Djupekås	SWE			1
			217	Goodnestone Black	GBR			1
			202	Guigne Presgaux 2	BEL			1
			128	Fekete Helyi Sukoró	HUN			1
			201	Cerise de Lignette	BEL			1
			144	Černá Špička	CZE			1
			83	Gemella	ITA			1
			205	Cerise Proces	BEL			1
			143	Torbágyi Késői	HUN			1
			251	Almore	SWE	Napoleon	Frogmore	3
			254	Hedemora	SWE			2
			198	Abbesse de Mouland	BEL			1
			222	Nutberry Black	GBR			2
			204	Cerise Brunin	BEL			1
			199	Pirette de Biercée	BEL			1
			237	Osabaer	NOR			1
			190	Teickners Schwarze Herzkirsche	DEU			2
			147	Chlumecká černá Chrupka	CZE			1
			109	Petrokeraso Tragano Axaias	GRC			1
			157	Těchlovická	CZE			1
			140	Solymári Gömbölyű	HUN			1
			62	Napoleon	DEU			2
			34	Bigarreau Marmotte	FRA			2
			192	Hedelfinger	DEU			2
			68	Bing	USA	Black Republican op		3
			244	Sue	CAN	Bing	Schmidt	3
			59	Nanyo	JPN	Napoleon op		3
			245	Tolleiv	NOR			1
			161	Catchice 6	SVK			1
			70	Ferrovia	ITA			3
			186	Lommatzscher Glasierte	DEU			2
			66	Uriase de Bistrita	ROU	Gemersdorfer	Hedelfingen	3
			63	Kavics	HUN	Gemersdorfer Orias	Budakalaszi Helyi Fekete	3
			136	Májusi Hosszúszárú	HUN			1
			131	Gyöngyösi Szívcseresznye	HUN			1
			49	Blancale Tardive	FRA			1
			86	Bijeli Triješanj	BIH			1
			171	Sämling aus Sauerbrunn	AUT			1
			85	Okićka	HRV			1
			169	Donnerskircher Blaukirsche	AUT			1
			103	Aslamka	BIH			1
			91	Alica	BIH			1
			100	Cipov	BIH			1
			99	Banjalučka Crnica	BIH			1
			253	Gårdebo	SWE			2
			172	Marzer Kirsche	AUT			1
			156	Švestičková	FRA			1
			43	Olivette	FRA			1
			159	Cachtice 3	SVK			1
			108	Mavro Proimo Vitalou	GRC			1
			170	Schartner Rainkirsche	AUT			1
			31	Hâtive de Bâle	CHE			1
			178	Dolleseppler	DEU			2
			148	Karešova Raná	CZE			1
			133	Késői Helyi Fekete	HUN			1
			215	Cryall's Seedling	GBR			1
			216	Early Rivers	GBR	Early Purple Guigne op		3
			195	Helshoven	BEL			1
			238	Jorunn Os morell	NOR			1
			115	Galata	ROU			3
			98	Haslama	BIH			1
		b	183	Knauffs Schwarze	DEU			2
			182	Kassins Frühe	DEU			2
			187	Nafrina	DEU	Werdersche Frühe	Büttners Rote Knorpelkirsche	3
			250	Werder	DEU			2
	2	a	225	Alvsaker	NOR			1
			211	Ironsides	GBR			1
			224	Aga	NOR			1
			117	Basicate	ROU	selections of indigenous old cultivars		2
			242	Schmidt	DEU			2
			191	Schöne von Marienhöhe	DEU			2
			53	Bigarreau Saint Bruno	FRA			1
			185	Leipziger Lotkirsche	DEU			2
			90	Grki Hrušt	BIH			1
			234	Kvit Spansk	NORµ			1
			256	Huldra	SWE	Allmän gulröd bigarrå	Erianne	3
			154	Pivovka	CZE			1
			48	Bigarreau Cœur	FRA			1
		b	236	Napoleon	DEU			2
			184	Kronprinz von Hannover	DEU			2
			311	Mindauge	LTU	Severnaya	Jurgita= (Hedelfingen x Dniprovka)	3
			57	Regina	DEU	Schneiders Späte Knorpelkirsche	Rube	3
			257	Mahogny Från Näsum	SWE			2
III	1	a	298	Leningradskaya Chornaya	RUS	Black Eagle	Tatarskaya Chornaya	3
			274	Meelika	EST	Leningradskaya Chornaya op		3
			275	Anu	EST	Leningradskaya Chornaya op		3
			267	Tiki	EST	Kati op		3
			259	Reelu	EST			3
			271	Arthur	EST	Krasavica (or Krasavitsa) op		3
			261	Veidenbergi Maguskirss	EST			3
			302	Radica	RUS	Leningradskaya Chornaya	Komunarka	3
			300	Iputj	RUS	Zhabule= (Leningradskaya Chornaya x Pobeda) op		3
			270	Mupi	EST	Kati op		3
			304	Kompaktnaya Venyaminova	RUS	Leningradskaya Chornaya op		3
			303	Ovstuzhenka	RUS	Kompaktnaya Venyaminova	Leningradskaya Chornaya	3
			301	Tyutchevka	RUS	Bryansk 3-36	Krasnaya Plotnaya	3
			282	Leningradskaja Chernaja	RUS	Black Eagle	Tatarskaya Chornaya	3
			263	Maia	EST			1
			299	Bryanskaya Rozovaya	RUS	Muskatnaya Chornaya op		3
			264	Maardu Maguskirss	EST			1
			286	Vidzemes Sārtvaidzis	LVA			1
			280	Zorka	ESTµ	Ochsen Herzkirsche	Rumyaniye Schochki	3
			273	Tontu	EST	Norri op		3
			269	Piret	EST	Norri op		3
			292	Iedzēnu Dzeltenais	LVA			3
			265	Kadrin	EST	Norri op		3
			268	Elle	EST	Juku op		3
			262	Helgi	EST			1
			295	AM-2410-22	LVA			2
			181	Drogans Gelbe Knorpelkirsche	DEU			2
			288	Aija	LVA			3
			126	Fehér Cseresznye	HUN			1
			51	Versaillaise	FRA			1
			296	Paula	LVA	Krupnoplodnaya op		3
			309	Aelita	UKR	Drogans Gelbe Knorpelkirsche op		3
			308	Donchanka	UKR	Drogans Gelbe Knorpelkirsche op		3
			310	Ugoljok	UKR	Drogans Gelbe Knorpelkirsche	Valerij Tchkalov	3
			291	Aleksandrs	LVA	Drogans Gelbe Knorpelkirsche	local cherry	3
			277	Adelina	ESTµ	Slava Zhukova	Valerij Tchkalov	3
			73	Lucrezia	ITA	Vittoria	Breeding Selection (C.2.27.12)	3
			297	Artis	LVA	Krupnoplodnaya op		3
			289	PU 14406	LVA			2
			27	Valerij Chkalov	UKR	Rozozva op		3
			305	Valerij Chkalov	UKR	Kavkazskaya Rozovaja		3
			226	Giant	USA			2
			260	Madissoni Roosa	EST			3
			96	Bijela Hašlama	BIH			1
		b	214	Burcombe	GBR			2
			209	Early Birchenhayes	GBR			2
			210	Hollander	NLD			1
			139	Péceli Cseresznye	HUN			1
			290	Balzams	LVA	Grosse Schwarze Knorpelkirsche	Germersdorfer Knorpelkirsche	3
			19	Francesa Alenquer	PRT			2
			246	Coe's Transparent	USA			2
			153	Pivka	CZE			1
			179	Früheste der Mark	DEU/FRA&			2
			213	Waterloo	GBR	Ambree	May Duke	2
			212	Ronald's Heart	GBR			1
			193	Grafenburger	DEU			2
			113	Vasiliadi	GRC			1
			111	Tsolakeiko	GRC			1
			107	Lemonidi	GRC			1
			61	O.T.E.A	GRC			3
			112	Tragana Edessis	GRC			1
			118	Draganele de Pitesti	ROU	selections of indigenous old cultivars		2
			33	Etienne Thuilleaux	FRA			1
			116	Maxut	ROU			3
	2		54	Jerusalem	FRA			1
			46	Bigarreau Cœur de Pigeon Tardif	FRA			1
			47	Xapata	FRA			1
			134	Késői Vadcseresznye	HUN			1
			37	Bigarreau Noir d'Ecully	FRA			1
			28	Bruelles	FRA			1
			42	Blancale Précoce	FRA			1
			75	Malizia	ITA			1
			55	Durette	FRA			1
			40	Saint Georges	FRA			1
			41	Cristobalina	ESP			1
			166	Brdarka 311	SVK			1
		a	165	Brdarka 245	SVK			1
			158	Žalanka	CZE			1
			287	Indra	LVA			3
			284	Strazdes Agrais	LVA			3
			314	Vytenu Juodoji	LTU	Žemaičiu raudonoji	Dniprovka	3
			44	Bigarreau Hâtif Burlat	FRA			2
			3	BA	MARµ			NA
			35	Bigarreau Moreau	FRA			2
			64	Glacier	USA	Stella	Big. Hâtif Burlat	3
			88	Rani Hrušt	BIH			1
			26	Lisboeta	PRT			2
			32	Bigarreau Grand	FRA			1
			30	Bigarreau Maria Gaucher	FRA			1
			281	Jurgita	LTU	Hedelfingen	Dniprovka	3
			241	Svart Spansk	NORµ			2
			233	Kunze	DEU			2
			200	Rouge Dorée	BEL			1
			283	Talsu 1	LVA			1
		b	36	Merveille de Saint Genis Laval	FRA			1
			92	Divlja Crna	BIH			1
			239	Berny	FRA			2
			230	Torblå	NOR			1
			155	Přeúrodná Srdcovka	CZE			1
	accessions in color correspond to accessions belonging to the different Structure popilations (q>0.8)
µ	origin country of the accession is unknown here country of the collection which maintained the accession is indicated

## Sheet: Table S9
CHUNQ£	Number in the study	Country of the collection	Accession Code	Accession Name	Origin country when Known	Status	Pedigree when known		Synonyms Known
		(according with the ISO code 3166-1 alpha 3)				1=landrace	Parent 1	Parent 2
						2= early selection
						3=modern breeding
109	169	AUT	BOKU-001	Donnerskircher Blaukirsche	AUT	1
110	170	AUT	BOKU-002	Schartner Rainkirsche	AUT	1
111	171	AUT	BOKU-003	Sämling aus Sauerbrunn	AUT	1
112	172	AUT	BOKU-004	Marzer Kirsche	AUT	1
88	173	AUT	BOKU-005	Kritzendorfer Einsiedekirsche Typ 1	AUT	1
88	174	AUT	BOKU-006	Kritzendorfer Einsiedekirsche Typ 2	AUT	1
3	175	AUT	KLOST-001	Horitschoner Kirsche	AUT	1
9	176	AUT	KLOST-002	Kirsche Kierling	AUT	2
113	195	BEL	BEL19-CRAW-001	Helshoven	BEL	1
114	196	BEL	BEL19-CRAW-002	Bigarreau Ghijssens	BEL	1
9	197	BEL	BEL19-CRAW-003	Bigarreau Jaune Tardif	BEL	1
115	198	BEL	BEL19-CRAW-004	Abbesse de Mouland	BEL	1
116	199	BEL	BEL19-CRAW-007	Pirette de Biercée	BEL	1
117	200	BEL	BEL19-CRAW-008	Rouge Dorée	BEL	1
119	201	BEL	BEL19-CRAW-009	Cerise de Lignette	BEL	1
120	202	BEL	BEL19-CRAW-010	Guigne Presgaux 2	BEL	1
23	203	BEL	BEL19-CRAW-011	Cerise Benne	BEL	1
121	204	BEL	BEL19-CRAW-012	Cerise de Brunin	BEL	1
22	205	BEL	BEL19-CRAW-013	Cerise Proces	BEL	1
115	206	BEL	BEL19-CRAW-014	Bigarreau Noir	BEL	1
30	207	BEL	BEL19-CRAW-015	Bigarreau Blanc Tardif	BEL	1
115	208	BEL	BEL19-CRAW-016	Bigarreau Noir Hâtif	BEL	1
122	86	BIH	BiH039-116	Bijeli Triješanj	BIH	1
29	87	BIH	BiH039-192	Aprilska	BIH	1			Mostarska Rana
77	88	BIH	BiH039-193	Rani Hrušt	BIH	1
3	89	BIH	BiH039-194	Kasni hrušt	BIH	1
118	90	BIH	BiH039-195	Grki Hrušt	BIH	1
123	91	BIH	BiH039-196	Alica	BIH	1
124	92	BIH	BiH039-197	Divlja Crna	BIH	1
23	93	BIH	BiH039-198	Bijeli Rušt	BIH	1
118	94	BIH	BiH039-199	Crni Rušt	BIH	1
103	95	BIH	BiH039-200	Ašlama S.T.	BIH	1
125	96	BIH	BiH039-201	Bijela Hašlama	BIH	1
23	97	BIH	BiH039-202	Hrušt	BIH	1
126	98	BIH	BiH039-203	Hašlama	BIH	1
127	99	BIH	BiH039-205	Banjalučka Crnica	BIH	1
128	100	BIH	BiH039-206	Cipov	BIH	1
129	101	BIH	BiH039-207	Bjelica-Biljur	BIH	1
44	102	BIH	BiH039-208	Crveni Hrušt	BIH	1
129	103	BIH	BiH039-209	Ašlamka	BIH	1
1	144	CZE	10F001	Černá Špička	CZE	1
28	145	CZE	10F002	Granát	CZE	1
23	146	CZE	10F003	Holovouská Chrupka	CZE	1
13	147	CZE	10F004	Chlumecká černá Chrupka	CZE	1
130	148	CZE	10F005	Karešova Raná	CZE	1
2	149	CZE	10F006	Kaštánka	GBR	1
21	150	CZE	10F007	Kordia	CZE	2
131	151	CZE	10F008	Ladeho pozdní	CZE	1
132	152	CZE	10F009	Libědjovická raná	CZE	1
133	153	CZE	10F010	Pivka	CZE	1
134	154	CZE	10F011	Pivovka	CZE	1
5	155	CZE	10F012	Přeúrodná Srdcovka	CZE	1
135	156	CZE	10F013	Švestičková	FRA	1
136	157	CZE	10F014	Těchlovická	CZE	1
137	158	CZE	10F015	Žalanka	CZE	1
44	177	DEU	DEU451-001	Büttners Rote Knorpelkirsche	DEU	2
90	178	DEU	DEU451-002	Dollenseppler	DEU	3
29	179	DEU	DEU451-003	Früheste der Mark	DEU/FRA&	2
8	180	DEU	DEU451-004	Grolls Schwarze	DEU	2
9	181	DEU	DEU451-005	Drogans Gelbe Knorpelkirsche	DEU	2
84	182	DEU	DEU451-006	Kassins Frühe	DEU	2
32	183	DEU	DEU451-007	Knauffs Schwarze	DEU	2
85	184	DEU	DEU451-008	Kronprinz von Hannover	DEU	2
89	185	DEU	DEU451-009	Leipziger Lotkirsche	DEU	2
86	186	DEU	DEU451-010	Lommatzscher Glasierte	DEU	2
87	187	DEU	DEU451-011	Nafrina	DEU	3	Werdersche Frühe	Büttners Rote Knorpelkirsche
30	188	DEU	DEU451-012	Große Prinzessin	NLD	2
3	189	DEU	DEU451-013	Schneiders Späte Knorpel Typ Nordwunder	DEU	2
39	190	DEU	DEU451-014	Teickners Schwarze Herzkirsche	DEU	2
88	191	DEU	DEU451-015	Schöne von Marienhöhe	DEU	2
23	192	DEU	DEU451-016	Hedelfinger	DEU	2
71	193	DEU	DEU451-017	Grafenburger	DEU	2
25	194	DEU	DEU451-018	Souvenir de Charmes	FRA	2
138	259	EST	EST012-001	Reelu	EST	3
139	260	EST	EST012-002	Madissoni Roosa	EST	3
140	261	EST	EST012-003	Veidenbergi Maguskirss	EST	3
141	262	EST	EST012-004	Helgi	EST	1
142	263	EST	EST012-005	Maia	EST	1
143	264	EST	EST012-006	Maardu Maguskirss	EST	1
144	265	EST	EST012-007	Kadrin	EST	3	Norri
141	266	EST	EST012-008	Kaie	EST	3	Zorka	Zorka
145	267	EST	EST012-009	Tiki	EST	3	Meelika
146	268	EST	EST012-010	Elle	EST	3	Juku op
147	269	EST	EST012-011	Piret	EST	3	Norri op
148	270	EST	EST012-012	Mupi	EST	3	Kati op
149	271	EST	EST012-013	Arthur	EST	3	Krasavica (or Krasavitsa) op
140	272	EST	EST012-014	Tõmmu	EST	3	Krasavica (or Krasavitsa)
150	273	EST	EST012-015	Tontu	EST	3	Norri op
151	274	EST	EST012-016	Meelika	EST	3	Leningradskaya Chornaya op
152	275	EST	EST012-017	Anu	EST	3	Leningradskaya Chornaya
153	276	EST	EST012-018	Irma	EST	3	Leningradskaya Chornaya op
154	277	EST	EST012-019	Adelina	RUS	3	Slava Zhukova	Valerij Tchkalov
155	278	EST	EST012-020	Iput	RUS	3	(Leningradskaya Chornaya x Pobeda)	seedling of Jabule
148	279	EST	EST012-021	Gronkavaja	BLR	3	Severnaya
156	280	EST	EST012-022	Zorka	RUS	3	Ochsen Herzkirsche (or Golubinoe Serdtse)	Rumyaniye Schochki
157	281	EST	EST012-023	Jurgita	LTU	3	Hedelfingen	Dniprovka
153	282	EST	EST012-024	Leningradskaja Chernaja	RUS	3	Black Eagle	Tatarskaya Chornaya
158	27	FRA	FRA057-001	Valerij Tchkalov	UKR	3	Kavkazshaya Rozozva op
159	28	FRA	FRA057-002	Bruelles	FRA	1
160	29	FRA	FRA057-003	Guigne Douce du Champ de lair	FRA	1
161	30	FRA	FRA057-004	Bigarreau Maria Gaucher	FRA	1
162	31	FRA	FRA057-005	Hative de Bale	CHE	1
163	32	FRA	FRA057-006	Bigarreau Grand	FRA	1
164	33	FRA	FRA057-007	Etienne Thuilleaux	FRA	1
165	34	FRA	FRA057-008	Bigarreau Marmotte	FRA	1
25	35	FRA	FRA057-009	Bigarreau Moreau	FRA	2
166	36	FRA	FRA057-010	Merveille de Saint Genis Laval	FRA	1
167	37	FRA	FRA057-011	Bigarreau Noir dEcully	FRA	2
99	38	FRA	FRA057-012	Bigarreau Camus de Venasque	FRA	1
4	39	FRA	FRA057-013	Tombret	FRA	2
168	40	FRA	FRA057-014	Saint Georges	FRA	1
169	41	FRA	FRA057-015	Cristobalina	ESP	1
170	42	FRA	FRA057-016	Blancale Precoce	FRA	1
171	43	FRA	FRA057-017	Olivette	FRA	1
172	44	FRA	FRA057-018	Bigarreau Hatif Burlat	FRA	2
162	45	FRA	FRA057-019	Abouriou	FRA	1
173	46	FRA	FRA057-020	Bigarreau Cœur de Pigeon Tardif	FRA	1
174	47	FRA	FRA057-021	Xapata	FRA	1
175	48	FRA	FRA057-022	Bigarreau Coeur	FRA	1
176	49	FRA	FRA057-023	Blancale Tardive	FRA	1
9	50	FRA	FRA057-024	Grosse blanche de Verchocq	FRA	1
177	51	FRA	FRA057-025	Versaillaise	FRA	1
30	52	FRA	FRA057-026	Blanche de Gaujac	FRA	1
178	53	FRA	FRA057-027	Bigarreau Saint Bruno	FRA	1
179	54	FRA	FRA057-028	Jerusalem	FRA	1
180	55	FRA	FRA057-029	Durette	FRA	1
44	56	FRA	FRA057-030	Grosse Rouge de la Faculté	IRN	1
10	57	FRA	FRA057-031	Regina	DEU	3	Schneiders Späte Knorpelkirsche	Rube
181	58	FRA	FRA057-032	Garnet	USA	3
182	59	FRA	FRA057-033	Nanyo	JPN	3
183	60	FRA	FRA057-034	Cerna	ROU	3
184	61	FRA	FRA057-035	O.T.E.A	GRC	3
30	62	FRA	FRA057-036	Napoleon	DEU	2
185	63	FRA	FRA057-037	Kavics	HUN	3	Gemersdorfer Orias	Budakalaszi Helyi Fekete
186	64	FRA	FRA057-038	Glacier	USA	3	Stella	Burlat
187	65	FRA	FRA057-039	Van	CAN	3	Impératrice Eugénie op
188	66	FRA	FRA057-040	Uriase de Bistrita	ROU	3	Gemersdorfer	Hedelfingen
2	67	FRA	FRA057-041	Negre de Bistrita	ROU	3
189	68	FRA	FRA057-042	Bing	USA	3	Black Republican op
190	69	FRA	FRA057-043	Mora di Cazzano	ITA	1
95	209	GBR	GBR30-001	Early Birchenhayes	GBR	2
76	210	GBR	GBR30-002	Hollander	NLD	1
43	211	GBR	GBR30-003	Ironsides	GBR	1
59	212	GBR	GBR30-005	Ronald's Heart	GBR	1
60	213	GBR	GBR30-006	Waterloo	GBR	2	Ambree	May Duke
96	214	GBR	GBR30-007	Burcombe	GBR	2
191	215	GBR	GBR30-008	Cryall's Seedling	GBR	1
2	216	GBR	GBR30-009	Early Rivers	GBR	2	Early Purple Guigne op
40	217	GBR	GBR30-010	Goodnestone Black	GBR	1
41	218	GBR	GBR30-011	Ham Green Black	GBR	1
192	219	GBR	GBR30-012	Merton Bigarreau	GBR	3	Knights Early Black	Napoleon
103	220	GBR	GBR30-013	Merton Glory	GBR	3	Ursula Rivers	Noble
4	221	GBR	GBR30-014	Noble	GBR	2
34	222	GBR	GBR30-015	Nutberry Black	GBR	2
3	223	GBR	GBR30-017	Magyar Porc Csereszyne	HUN	1
77	104	GRC	GRC001	Agiorgitiko Lilantiou	GRC	1
184	105	GRC	GRC002	Mpakirtzeika	GRC	1
172	106	GRC	GRC003	Chalkidos	GRC	1
193	107	GRC	GRC004	Lemonidi	GRC	1
194	108	GRC	GRC005	Mavro Proimo Vitalou	GRC	1
195	109	GRC	GRC006	Petrokeraso Tragano Axaias	GRC	1
165	110	GRC	GRC008	Samou	GRC	1
196	111	GRC	GRC009	Tsolakeiko	GRC	1
197	112	GRC	GRC010	Tragana Edessis	GRC	1
198	113	GRC	GRC011	Vasiliadi	GRC	1
199	85	HRV	OK-1-HR	Okićka	HRV	1
3	123	HUN	NGYE-001	Badacsonyi	HUN	1
118	124	HUN	NGYE-002	Disznódi Fűszeres	HUN	1
3	125	HUN	NGYE-003	Farmosi Cseresznye	HUN	1
6	126	HUN	NGYE-004	Fehér Cseresznye	HUN	1
6	127	HUN	NGYE-005	Fehér Ropogós Pollenadó	HUN	1
200	128	HUN	NGYE-006	Fekete Helyi Sukoró	HUN	1
201	129	HUN	NGYE-007	Fekete Kőszemű	HUN	1
4	130	HUN	NGYE-008	Fertődi Csüngő	HUN	1
202	131	HUN	NGYE-009	Gyöngyösi Szívcseresznye	HUN	1
21	132	HUN	NGYE-010	Kecskecsöcsű	HUN	1
203	133	HUN	NGYE-011	Késői Helyi Fekete	HUN	1
131	134	HUN	NGYE-012	Késői Vadcseresznye	HUN	1
3	135	HUN	NGYE-013	Korai Ropogós	HUN	1
204	136	HUN	NGYE-015	Májusi Hosszúszárú	HUN	1
22	137	HUN	NGYE-016	Májusi Korai	HUN	1
6	138	HUN	NGYE-017	Pákozdi Fehér	HUN	1
205	139	HUN	NGYE-018	Péceli Cseresznye	HUN	1
206	140	HUN	NGYE-019	Solymári Gömbölyű	HUN	1
131	141	HUN	NGYE-020	Szeptember	HUN	1
204	142	HUN	NGYE-021	Szomolyai Fekete	HUN	1
207	143	HUN	NGYE-022	Torbágyi Késői	HUN	1
3	70	ITA	ITA380-163	Ferrovia	ITA	3
4	71	ITA	ITA380-201	Durone Nero II	ITA	1
208	72	ITA	ITA380-219	Durone Tardivo di Valstaffora	ITA	3
209	73	ITA	ITA380-299	Lucrezia	ITA	3	Vittoria	Breeding Selection (C.2.27.12)
210	74	ITA	ITA380-343	Giorgia	ITA	3	ISF 123 (breeding selection)	Caccianese
211	75	ITA	ITA380-347	Malizia	ITA	1
212	76	ITA	ITA380-491	Adriana	ITA	3	ISF 123 (breeding selection)	Mora di Cazzano
213	77	ITA	ITA380-500	Duroncino di Cesena	ITA	1
214	78	ITA	ITA380-502	Morena	ITA	1
215	79	ITA	ITA380-504	Durona di S. Giovanni	ITA	1
216	80	ITA	ITA380-506	Morandina	ITA	1
217	81	ITA	ITA380-508	Cornetta	ITA	2			Cornina;Corniola;Cornuzza;Barzizza
218	82	ITA	ITA380-510	Fiore	ITA	1			Ciliegio del Fiore
8	83	ITA	ITA380-512	Gemella	ITA	1			Durone di Cesena;Marciana
4	84	ITA	ITA380-514	Durona di Cesena	ITA	2
219	283	LVA	LVA001001	Talsu 1	LVA	1
220	284	LVA	LVA001002	Strazdes Agrais	LVA	1
151	285	LVA	LVA001003	Snēpeles Melnie	LVA	1
221	286	LVA	LVA001004	Vidzemes Sārtvaidzis	LVA	1
222	287	LVA	LVA001005	Indra	LVA	3
223	288	LVA	LVA001006	Aija	LVA	3
224	289	LVA	LVA001007	PU 14406	LVA	2
225	290	LVA	LVA001008	Balzams	LVA	3	Grosse Schwarze Knorpelkirsche	Germersdorfer Knorpelkirsche
226	291	LVA	LVA001009	Aleksandrs	LVA	3	Drogans Gelbe Knorpelkirsche	local cherry
227	292	LVA	LVA001010	Iedzēnu Dzeltenais	LVA	3
9	293	LVA	LVA001011	Dzintars	LVA	3	Drogans Gelbe Knorpelkirsche	Vidzemes Sārtvaidzis
228	294	LVA	LVA001012	Agris	LVA	3	Fromms Schwarze Herzkirsche
229	295	LVA	LVA001013	AM 24-10-22	LVA	2
230	296	LVA	LVA001014	Paula	LVA	3	Krupnoplodnaya
231	297	LVA	LVA001015	Artis	LVA	3	Krupnoplodnaya
232	298	LVA	LVA001016	Leningradskaja Chornaya	RUS	3	Black Eagle	Tatarskaya Chornaya
233	299	LVA	LVA001017	Bryanskaya Rozovaya	RUS	3	Muskatnaya Chornaya
155	300	LVA	LVA001018	Iputj	RUS	3	(Leningradskaya Chornaya x Pobeda)	seedling of Jabule
234	301	LVA	LVA001019	Tyutchevka	RUS	3	Bryansk 3-36	Krasnaya Plotnaya
235	302	LVA	LVA001020	Radica	RUS	3	Leningradskaya Chornaya	Komunarka
236	303	LVA	LVA001021	Ovstuzhenka	RUS	3	Kompaktnaya Venyaminova	Leningradskaya Chornaya
237	304	LVA	LVA001022	Kompaktnaya Venyaminova	RUS	3	Leningradskaya Chornaya
238	305	LVA	LVA001023	Valerij Tchkalov	UKR	3	Kavkazskaya Rozovaja
239	306	LVA	LVA001024	Donecky 24-37	UKR	3
15	307	LVA	LVA001025	Krupnoplodnaya	UKR	3	Napoleon
240	308	LVA	LVA001026	Donchanka	UKR	3	Drogans Gelbe Knorpelkirsche
241	309	LVA	LVA001027	Aelita	UKR	3	Drogans Gelbe Knorpelkirsche
18	310	LVA	LVA001028	Ugoljok	UKR	3	Drogans Gelbe Knorpelkirsche	Valerii Chkalov
242	311	LVA	LVA001029	Mindauge	LTU	3	Severnaya	Jurgita
243	312	LVA	LVA001030	Agila	LTU	3	Leningradskaya Chornaya	Priusadebnaya
11	313	LVA	LVA001031	Auste	LTU	3	Hedelfingen	Rožinė
244	314	LVA	LVA001032	Vytenu Juodoji	LTU	3	Žemaičiu raudonoji	Dniprovka
25	1	MAR	Mor001	3BC	MARµ	NA
172	2	MAR	Mor002	Bah	MARµ	NA
245	3	MAR	Mor003	BA	MARµ	NA
246	4	MAR	Mor004	Inconnu 1 S13	MARµ	NA
172	5	MAR	Mor005	BGh	MARµ	NA
172	6	MAR	Mor006	BN	MARµ	NA
172	7	MAR	Mor007	Burlat 1R	FRA	2
187	8	MAR	Mor008	CA	MARµ	NA
162	9	MAR	Mor009	Cerissette 1R	MARµ	NA
165	10	MAR	Mor010	Cpi	MARµ	NA
3	11	MAR	Mor011	Cpl	MARµ	NA
247	12	MAR	Mor012	MA	MARµ	NA
5	13	MAR	Mor013	Napoleon 1A	DEU	1
30	14	MAR	Mor014	NS	MAR	NA
246	15	MAR	Mor015	S12	MAR	NA
187	16	MAR	Mor016	Van1Q	CAN	3
3	17	MAR	Mor017	Van	CAN	3	Impératrice Eugénie op
187	18	MAR	Mor018	VN	MARµ	NA
248	224	NOR	411	Aga	NOR	1
7	225	NOR	401	Alvsaker	NOR	1
249	226	NOR	103	Giant	USA	2
7	227	NOR	501	Gul Biggarreau	NORµ	2
250	228	NOR	204	Holmabær	DEU	1
25	229	NOR	002	Hordatun	NOR	1
251	230	NOR	110	Torblå	NOR	1
248	231	NOR	301	Små Elton	GBR	2
84	232	NOR	406	Kassin	DEU	2
252	233	NOR	108	Kunze	DEU	2
27	234	NOR	005	Kvit Spansk	NORµ	1
84	235	NOR	507	Mersten	NORµ	1
253	236	NOR	505	Napoleon	DEU	2
254	237	NOR	304	Osabaer	NOR	1
255	238	NOR	607	Jorunn Os morell	NOR	1
256	239	NOR	210	Berny	FRA	2
44	240	NOR	408	Emperor Francis	DEU/AUT&	2
257	241	NOR	511	Svart Spansk	NORµ	2
258	242	NOR	008	Schmidt	DEU	3	Gross Schwarze Knorpelkirsche op
5	243	NOR	311	Stor Elton	GBR	1
259	244	NOR	105	Sue	CAN	3	Bing	Schmidt
260	245	NOR	611	Tolleiv	NOR	1
74	246	NOR	605	Coe's Transparent	USA	2
29	247	NOR	601	Früheste der Mark	DEU/FRA&	2
2	248	NOR	208	Early Rivers	GBR	2
261	249	NOR	307	Victor	CAN	3	Windsor op
46	250	NOR	203	Werder	DEU	2
101	19	PRT	INIAV-100	Francesa Alenquer	PRT	2
25	20	PRT	INIAV-101	Tavora A	PRT	1
9	21	PRT	INIAV-102	Branca	PRT	1
99	22	PRT	INIAV-103	De Saco	PRT	2
44	23	PRT	INIAV-104	Morangal	PRT	2
187	24	PRT	INIAV-105	Maringa	PRT	2
25	25	PRT	INIAV-106	Tavora VR	PRT	1
247	26	PRT	INIAV-107	Lisboeta	PRT	2
44	114	ROU	RORSFGI-001	Boambe de Cotnari	ROU	3
262	115	ROU	RORSFGI-002	Galata	ROU	3
263	116	ROU	RORSFGI-003	Maxut	ROU	3
250	117	ROU	RORSFGI-004	Basicate	ROU	2	selections of indigenous old cultivars
264	118	ROU	RORSFGI-005	Draganele de Pitesti	ROU	2	selections of indigenous old cultivars
265	119	ROU	RORSFGI-006	Bucium	ROU	3	Van	Boambe de Cotnari
266	120	ROU	RORSFGI-007	Ludovic	ROU	3	Van	Boambe de Cotnari
267	121	ROU	RORSFGI-008	Andrei	ROU	3	Pietroase Negre de Odessa o.p.	Boambe de Cotnari
268	122	ROU	RORSFGI-009	Daria	ROU	3	Boambe de Cotnari	Thurn und Taxis
269	159	SVK	SVK001001	Cachtice 3	SVK	1
23	160	SVK	SVK001002	Cachtice 4	SVK	1
3	161	SVK	SVK001003	Cachtice 6	SVK	1
3	162	SVK	SVK001004	Cachtice 7	SVK	1
77	163	SVK	SVK001005	Cachtice 8	SVK	1
3	164	SVK	SVK001006	Cachtice 17	SVK	1
270	165	SVK	SVK001007	Brdarka 245	SVK	1
271	166	SVK	SVK001008	Brdarka 311	SVK	1
23	167	SVK	SVK001009	Brdarka 795	SVK	1
2	168	SVK	SVK001010	Dr.Macaj	SVK	1
272	251	SWE	BAL507	Almore	SWE	3	Napoleon	Frogmore
20	252	SWE	BAL517	Fryksås	SWE	2
20	253	SWE	BAL519	Gårdebo	SWE	2
24	254	SWE	BAL523	Hedemora	SWE	2
273	255	SWE	BAL525	Heidi	SWE	3	Allmän gulröd bigarrå	Büttners Rote Späte
31	256	SWE	BAL529	Huldra	SWE	3	Allmän gulröd bigarrå	Erianne
274	257	SWE	BAL607	Mahogny Från Näsum	SWE	2
275	258	SWE	BAL903	Kerstins Från Djupekås	SWE	1
£	CHUNQ=Cherry UNiQue genotype code, following a similar approach proposed by the European Malus community [31, 45, 46]
&	two different countries reported as origin country in the litterature
µ	origin country of the accession is unknown here country of the collection which maintained the accession is indicated

## Sheet: Table S10
Multiplex panel	Dye	Marker	LG	Repeat	Forward	Reverse	Allele range or size of cloned allele	Preliminary tests: Amplification signal/ease of scoring	Genotyping Reference
		name		Motif	Primer	Primer
A	NED	BPPCT034*	2	(GA)19	CTACCTGAAATAAGCAGAGCCAT	CAATGGAGAATGGGGTGC	228	N/A	[37]
B	FAM	BPPCT037	5	(GA)25	CATGGAAGAGGATCAAGTGC	CTTGAAGGTAGTGCCAAAGC	155	very good / easy to score	[36]
A	HEX	CPPCT006	8	(CT)16	AATTAACTCCAACAGCTCCA	ATGGTTGCTTAATTCAATGG	190	very good / easy to score	[36]
A	FAM	CPPCT022	7	(CT)28CAA(CT)20	CAATTAGCTAGAGAGAATTATTG	GACAAGAAGCAAGTAGTTTG	240	good / medium to score	[36]
A	FAM	CPSCT038*	2	(GA)18	CAGGAACCCTATTCCCACAA	TCAATGGCACCCATTTTACA	200	N/A	[37]
A	FAM	EMPa002	1	(AG)13	TGACAGGTCATCATACCATTTG	CAGGATTAAGCATTGCAAATTA	102-104	very good/easy to score	[36]
B	PET	EMPa004	6	(GA)4AA(GA)4AA(GA)15	TACGGTAGGCTTCTGCAAGG	TTGGCAGCCAACAAAATCA	180-188	very good / easy to score	[36]
A	HEX	EMPa015	4	(GA)32	TTTTGGTCAATCTGCTGCTG	CTCTCATCTTCCCCCTCCTC	216-239	very good / easy to score	[36]
B	PET	EMPa017	2	(AG)19	ATTTCAATGTGGGGATGAGC	TGAAGTGAGGGAAATGGAGC	238-240	very good / easy to score	[36]
B	PET	EMPa018	8	(GA)18	TCCAAGAACAAAGCCAAAATC	AATTTCAATGCATTCTGGATAG	94-106	very good / easy to score	[36]
B	NED	EMPaS01	6	(GA)9(GA)11	CAAAATCAACAAAATCTAAACC	CAAGAATCTTCTAGCTCAAACC	222-238	very good / easy to score	[36]
A	PET	EMPaS02	3	(TTG)7CTGC(TG)10(AG)8	CTACTTCCATGATTGCCTCAC	AACATCCAGAACATCAACACAC	133-145	very good / easy to score	[36]
B	FAM	EMPaS06	4	(CT)12	AAGCGGAAAGCACAGGTAG	TTGCTAGCATAGAAAAGAATTGTAG	200-218	very good / easy to score	[36]
A	NED	EMPaS10	4	(GA)28	GCTAATATCAAATCCCAGCTCTC	TGAAGAAGTATGGCTTCTGTGG	151-183	very good / easy to score	[36]
B	HEX	EMPaS12	3	(TG)10A/GA)10AA(GA)13	TGTGCTAATGCCAAAAATACC	ACATGCATTTCAACCCACTC	122-148	very good / easy to score	[36]
B	HEX	EMPaS14	5	(TC)10CCAT(TC)5CCAT(TC)8	TCCGCCATATCACAATCAAC	TTCCACACAAAAACCAATCC	196-210	very good / easy to score	[36]
A	HEX	PAV-Rf-SSR&	3	NA	ATGCTGCATTGTGAAAGTGG	GGTGTCTACCCCAGTTAAAAACG	351-361	N/A	[38]
B	NED	UDP96-005	1	(AC)16TG(CT)2CA(CT)11	GTAACGCTCGCTACCACAAA	CCTGCATATCACCACCCAG	155	good / medium to score	[39]
* Markers linked to fruit size
&Marker linked to flesh colour

[truncated: 2 more sheets: Table S11, Table S12]
